# Supplementary material for: Spontaneous crystallization of a new chiral open-framework borophosphate in the ionothermal system
Source: Royal Society of Chemistry journal article supplement (doi:10.1039/b919933k), 2010-01-01
Supplement: b919933k.pdf [file b919933k.pdf]

# **Electronic Supporting Information for:**

## **Spontaneous Crystallization of a New Chiral Open-Framework Borophosphate in the Isothermal System**

Hongzhu Xing, Yi Li, Tan Su, Jin Xu, Weiting Yang, Enbo Zhu, Jihong  
Yu\* and Ruren Xu

### **Contents:**

**Figure S1.** Experimental and simulated powder X-ray diffraction patterns for JIS-2

**Figure S2.** Thermal ellipsoid plots (50% probability) and atomic labeling scheme of JIS-2

**Figure S3.** A drawing showing the environment of the ammonium cations and the hydrogen bonding.

**Figure S4.** Thermogravimetric curve of JIS-2

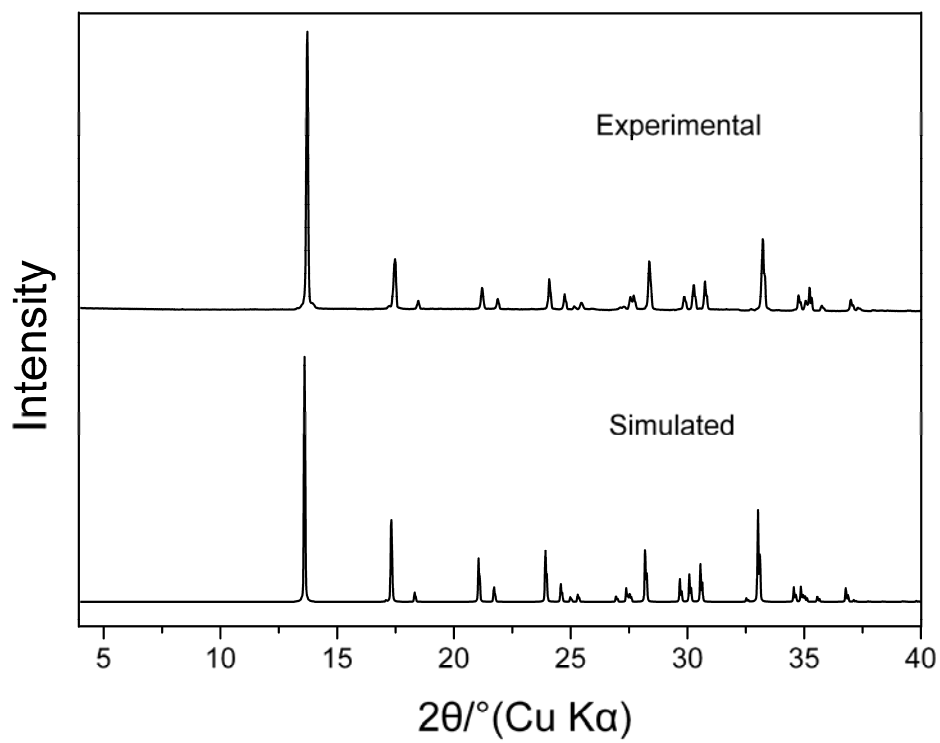

**Figure S1.**

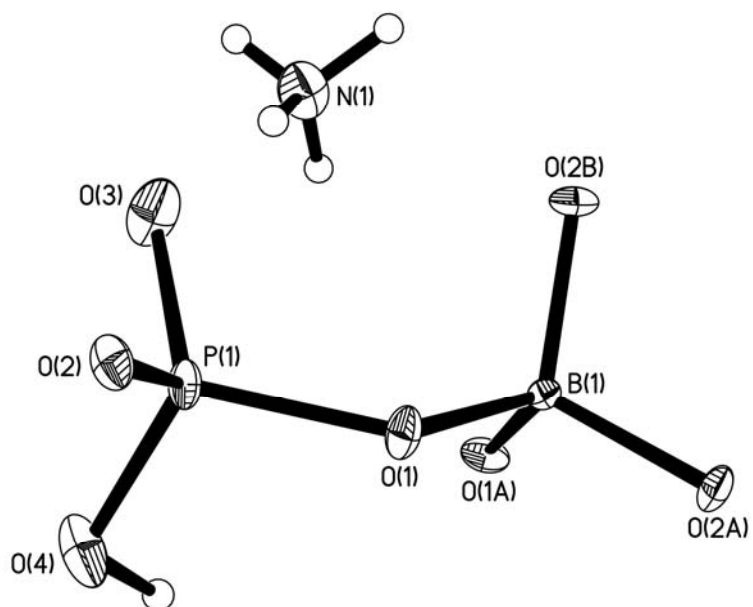

**Figure S2.**

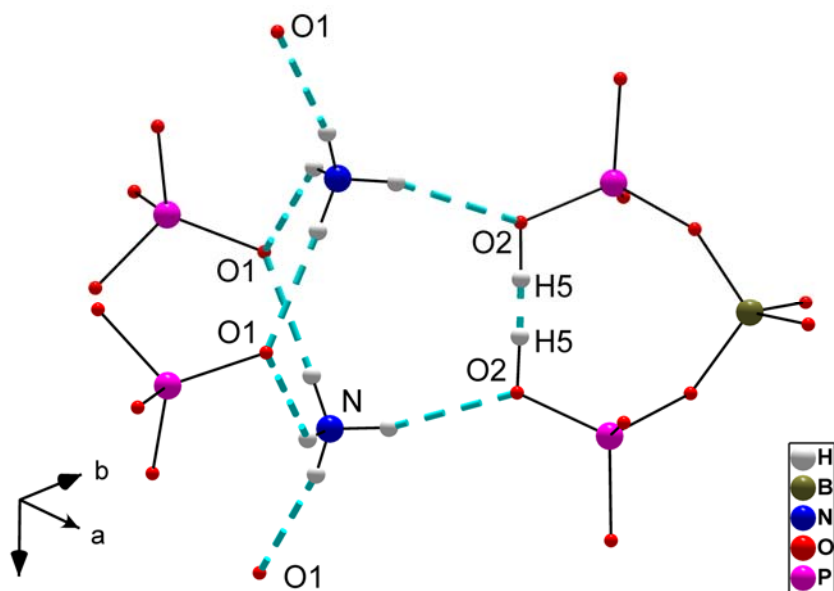

**Figure S3.**

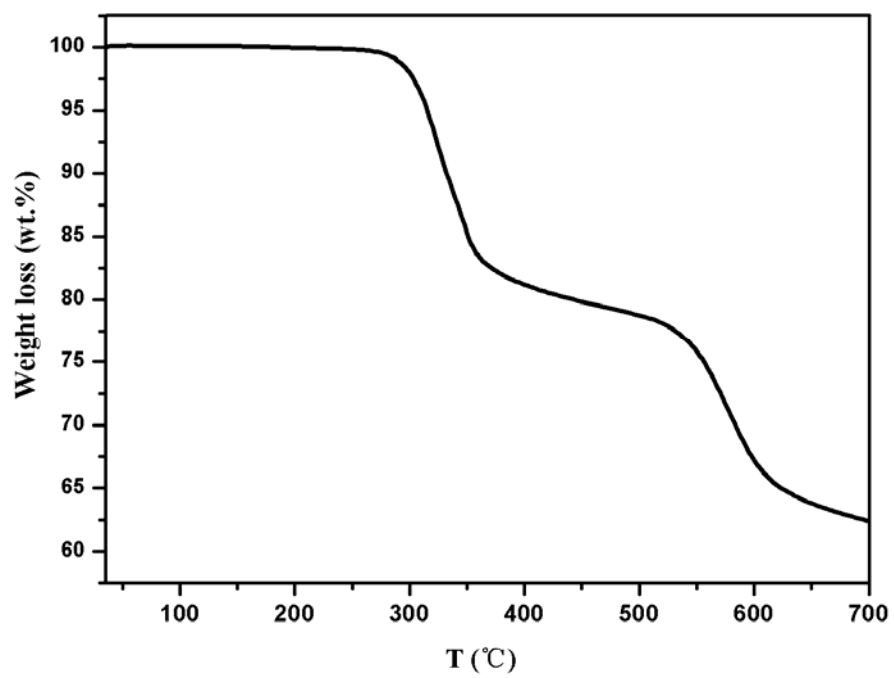

**Figure S4.**
